# Supplementary material for: Risk Factors and Biomarkers for Immune-Related Adverse Events: A Practical Guide to Identifying High-Risk Patients and Rechallenging Immune Checkpoint Inhibitors
Source: PubMed Central journal article supplement (PMC9086893; doi:10.3389/fimmu.2022.779691), 2022-04-26
Supplement: DataSheet_1.pdf [file DataSheet_1.pdf]

Supplementary Table S1: Potential mechanisms that increase the risk of immune-related adverse event incidence

| Risk factor or biomarker                                             | Possible mechanism for increasing the risk of irAE                                                                                                                           |
|----------------------------------------------------------------------|------------------------------------------------------------------------------------------------------------------------------------------------------------------------------|
| Age                                                                  | Age related changes to immune system (immunosensence) [1]                                                                                                                    |
| Gender                                                               | Immunomodulation by hormones - Generally, estrogens are considered enhancers of immune cells activity while progesterone and androgens are immunosuppressants [2]            |
| Higher body mass index                                               | Increased leptin in obesity is pro-inflammatory [3]                                                                                                                          |
| Sarcopenia and low muscle mass                                       | Altered metabolism and clearance of anticancer drugs, and pro inflammatory state [4]                                                                                         |
| Allergy                                                              | Activation of allergen-specific CD4+ T cells [5]                                                                                                                             |
| Autoimmune disease or autoimmune antibody detection                  | Common human leukocyte antigen (HLA) loci involved [6]                                                                                                                       |
| Comorbidities                                                        | Exacerbation of preexisting conditions and vasculitis [7].                                                                                                                   |
| Medications                                                          | Changes in microbiome (antibiotics) or may induce loss of tolerance of memory T cells that have previously been primed to a drug or other hapten (ACE/ARB, NSAID or PPI) [8] |
| Vitamin D                                                            | Mediates downregulation of IL-17A and upregulation of IL-10 resulting in IFN- $\beta$ mediated effect on CD4+ T [9, 10]                                                      |
| Influenza vaccine                                                    | Viral-based vaccination mediated infiltration of central memory T cells into the tissues, leading to irAE [11]                                                               |
| Higher tumor mutational burden                                       | Higher neoantigenic load leading to more immunogenicity [12]                                                                                                                 |
| Immune system related biomarkers<br>- Circulating blood cells (white | Dynamic alteration in tumor microenvironment, macrophage activation and fluctuations in signaling cytokines along with pro                                                   |

|                                                      |                                                                                                       |
|------------------------------------------------------|-------------------------------------------------------------------------------------------------------|
| blood cells – all kinds and platelets) and cytokines | inflammatory conditions are responsible for increased irAEs [6, 13-21]                                |
| Serum proteins                                       | Nutritional status can influence the degree of systemic immune activation and higher irAEs [18]       |
| Specific gene expression and micro-RNA profiling     | Increased inflammatory response and predisposition to autoimmune disease [22-24]                      |
| Intestinal microbiota                                | Variable levels of Tregs levels in gut influenced by flora can lead to significant irAEs [17, 25, 26] |

irAE- immune related-adverse events; PPI - Proton-pump inhibitors; NSAID - nonsteroidal anti-inflammatory drugs; ACE angiotensin-converting enzyme inhibitors, ARB angiotensin receptor blockers.

1. Wong, S.K., C.A. Nebhan, and D.B. Johnson, *Impact of Patient Age on Clinical Efficacy and Toxicity of Checkpoint Inhibitor Therapy*. *Frontiers in Immunology*, 2021. **12**.
2. Triggianese, P., et al., *Immune checkpoint inhibitors-induced autoimmunity: The impact of gender*. *Autoimmunity Reviews*, 2020. **19**(8): p. 102590.
3. Guzman-Prado, Y., J. Ben Shimol, and O. Samson, *Body mass index and immune-related adverse events in patients on immune checkpoint inhibitor therapies: a systematic review and meta-analysis*. *Cancer Immunology, Immunotherapy*, 2021. **70**(1): p. 89-100.
4. Daly, L.E., et al., *The impact of body composition parameters on ipilimumab toxicity and survival in patients with metastatic melanoma*. *British Journal of Cancer*, 2017. **116**(3): p. 310-317.
5. Shimozaki, K., et al., *Analysis of risk factors for immune-related adverse events in various solid tumors using real-world data*. *Future Oncology*, 2021.
6. Michailidou, D., et al., *Association of blood biomarkers and autoimmunity with immune related adverse events in patients with cancer treated with immune checkpoint inhibitors*. *Scientific Reports*, 2021. **11**(1).
7. Pirozzi, F., et al., *Cardiovascular Toxicity of Immune Checkpoint Inhibitors: Clinical Risk Factors*. *Current Oncology Reports*, 2021. **23**(2).
8. Franzin, R., et al., *The Use of Immune Checkpoint Inhibitors in Oncology and the Occurrence of AKI: Where Do We Stand?* *Frontiers in Immunology*, 2020. **11**.
9. Dankers, W., et al., *Human Memory Th17 Cell Populations Change Into Anti-inflammatory Cells With Regulatory Capacity Upon Exposure to Active Vitamin D*. *Front Immunol*, 2019. **10**: p. 1504.
10. Joshi, S., et al., *1,25-dihydroxyvitamin D(3) ameliorates Th17 autoimmunity via transcriptional modulation of interleukin-17A*. *Mol Cell Biol*, 2011. **31**(17): p. 3653-69.
11. Läubli, H., et al., *Influenza vaccination of cancer patients during PD-1 blockade induces serological protection but may raise the risk for immune-related adverse events*. *Journal for ImmunoTherapy of Cancer*, 2018. **6**(1).
12. Y, S., et al., *The association between tumor burden and severe immune-related adverse events in non-small cell lung cancer patients responding to immune-checkpoint inhibitor treatment*. *Lung cancer (Amsterdam, Netherlands)*, 2019. **130**.

13. Tyan, K., et al., *Cytokine changes during immune-related adverse events and corticosteroid treatment in melanoma patients receiving immune checkpoint inhibitors*. *Cancer Immunology, Immunotherapy*, 2021.
14. Kang, D.H., et al., *Baseline Serum Interleukin-6 Levels Predict the Response of Patients with Advanced Non-small Cell Lung Cancer to PD-1/PD-L1 Inhibitors*. *Immune network*, 2020. **20**(3): p. e27-e27.
15. Khan, S., et al., *Immune dysregulation in cancer patients developing immune-related adverse events*. *British Journal of Cancer*, 2019. **120**(1): p. 63-68.
16. Lim, S.Y., et al., *Circulating Cytokines Predict Immune-Related Toxicity in Melanoma Patients Receiving Anti-PD-1–Based Immunotherapy*. *Clinical Cancer Research*, 2019. **25**(5): p. 1557-1563.
17. Chaput, N., et al., *Baseline gut microbiota predicts clinical response and colitis in metastatic melanoma patients treated with ipilimumab*. *Ann Oncol*, 2017. **28**(6): p. 1368-1379.
18. Oyanagi, J., et al., *Predictive value of serum protein levels in patients with advanced non-small cell lung cancer treated with nivolumab*. *Lung Cancer*, 2019. **132**: p. 107-113.
19. Valpione, S., et al., *Sex and interleukin-6 are prognostic factors for autoimmune toxicity following treatment with anti-CTLA4 blockade*. *Journal of Translational Medicine*, 2018. **16**(1).
20. Fujimura, T., et al., *Serum levels of soluble CD163 and CXCL5 may be predictive markers for immune-related adverse events in patients with advanced melanoma treated with nivolumab: a pilot study*. *Oncotarget*, 2018. **9**(21): p. 15542-15551.
21. Eun, Y., et al., *Risk factors for immune-related adverse events associated with anti-PD-1 pembrolizumab*. *Scientific Reports*, 2019. **9**(1).
22. Abdel-Wahab, N., et al., *Genetic determinants of immune-related adverse events in patients with melanoma receiving immune checkpoint inhibitors*. *Cancer Immunology, Immunotherapy*, 2021.
23. Shahabi, V., et al., *Gene expression profiling of whole blood in ipilimumab-treated patients for identification of potential biomarkers of immune-related gastrointestinal adverse events*. *Journal of Translational Medicine*, 2013. **11**(1): p. 75.
24. Marschner, D., et al., *MicroRNA-146a regulates immune-related adverse events caused by immune checkpoint inhibitors*. *JCI Insight*, 2020. **5**(6).
25. Dubin, K., et al., *Intestinal microbiome analyses identify melanoma patients at risk for checkpoint-blockade-induced colitis*. *Nat Commun*, 2016. **7**(1): p. 10391.
26. Tan, B., et al., *Clinical-radiological characteristics and intestinal microbiota in patients with pancreatic immune-related adverse events*. *Thorac Cancer*, 2021. **12**(12): p. 1814-1823.
